# Supplementary material for: Rattle Drum Inspired Triboelectric Nanogenerator Achieving a Record Triboelectric Surface Density of 2.76 cm&lt;-1sup&gt;
Source: Research Square preprint supplement (doi:10.21203/rs.3.rs-6391792/v1), 2025-05-14
Supplement: Supplementary file 1 [file 88f453f52f917d75e13d283b.xlsx]

## Sheet: Fig. N2
L49(78)
Row Num
Experiment Num	1	2	3	4	5	6	7	8
1	1	1	1	1	1	1	1	1
2	1	2	2	2	2	2	2	2
3	1	3	3	3	3	3	3	3
4	1	4	4	4	4	4	4	4
5	1	5	5	5	5	5	5	5
6	1	6	6	6	6	6	6	6
7	1	7	7	7	7	7	7	7
8	2	1	2	3	4	5	6	7
9	2	2	3	4	5	6	7	1
10	2	3	4	5	6	7	1	2
11	2	4	5	6	7	1	2	3
12	2	5	6	7	1	2	3	4
13	2	6	7	1	2	3	4	5
14	2	7	1	2	3	4	5	6
15	3	1	3	5	7	2	4	6
16	3	2	4	6	1	3	5	7
17	3	3	5	7	2	4	6	1
18	3	4	6	1	3	5	7	2
19	3	5	7	2	4	6	1	3
20	3	6	1	3	5	7	2	4
21	3	7	2	4	6	1	3	5
22	4	1	4	7	3	6	2	5
23	4	2	5	1	4	7	3	6
24	4	3	6	2	5	1	4	7
25	4	4	7	3	6	2	5	1
26	4	5	1	4	7	3	6	2
27	4	6	2	5	1	4	7	3
28	4	7	3	6	2	5	1	4
29	5	1	5	2	6	3	7	4
30	5	2	6	3	7	4	1	5
31	5	3	7	4	1	5	2	6
32	5	4	1	5	2	6	3	7
33	5	5	2	6	3	7	4	1
34	5	6	3	7	4	1	5	2
35	5	7	4	1	5	2	6	3
36	6	1	6	4	2	7	5	3
37	6	2	7	5	3	1	6	4
38	6	3	1	6	4	2	7	5
39	6	4	2	7	5	3	1	6
40	6	5	3	1	6	4	2	7
41	6	6	4	2	7	5	3	1
42	6	7	5	3	1	6	4	2
43	7	1	7	6	5	4	3	2
44	7	2	1	7	6	5	4	3
45	7	3	2	1	7	6	5	4
46	7	4	3	2	1	7	6	5
47	7	5	4	3	2	1	7	6
48	7	6	5	4	3	2	1	7
49	7	7	6	5	4	3	2	1

## Sheet: Fig. N4
Row Num.	1	2	3	4	5	6	7	8	Results
Experiment Num.	Acceleration: a (m s-2)	Amplitude: A (mm)	Terminal velocity: v (m s-1)	/	/	/	/	/	1-2: Q (nC)
1	3	10	2	/	/	/	/	/	74
2	3	20	3	/	/	/	/	/	193
3	3	30	4	/	/	/	/	/	125
4	3	40	5	/	/	/	/	/	103
5	3	50	6	/	/	/	/	/	131
6	3	60	7	/	/	/	/	/	246
7	3	70	8	/	/	/	/	/	114
8	5	10	3	/	/	/	/	/	686
9	5	20	4	/	/	/	/	/	743
10	5	30	5	/	/	/	/	/	456
11	5	40	6	/	/	/	/	/	500
12	5	50	7	/	/	/	/	/	736
13	5	60	8	/	/	/	/	/	738
14	5	70	2	/	/	/	/	/	469
15	7	10	4	/	/	/	/	/	1290
16	7	20	5	/	/	/	/	/	1261
17	7	30	6	/	/	/	/	/	1074
18	7	40	7	/	/	/	/	/	1084
19	7	50	8	/	/	/	/	/	1212
20	7	60	2	/	/	/	/	/	1233
21	7	70	3	/	/	/	/	/	1122
22	9	10	5	/	/	/	/	/	903
23	9	20	6	/	/	/	/	/	1137
24	9	30	7	/	/	/	/	/	1487
25	9	40	8	/	/	/	/	/	1285
26	9	50	2	/	/	/	/	/	1558
27	9	60	3	/	/	/	/	/	1354
28	9	70	4	/	/	/	/	/	1558
29	11	10	6	/	/	/	/	/	933
30	11	20	7	/	/	/	/	/	1573
31	11	30	8	/	/	/	/	/	1637
32	11	40	2	/	/	/	/	/	1716
33	11	50	3	/	/	/	/	/	1451
34	11	60	4	/	/	/	/	/	1790
35	11	70	5	/	/	/	/	/	1845
36	13	10	7	/	/	/	/	/	1286
37	13	20	8	/	/	/	/	/	1721
38	13	30	2	/	/	/	/	/	1953
39	13	40	3	/	/	/	/	/	1970
40	13	50	4	/	/	/	/	/	1628
41	13	60	5	/	/	/	/	/	1802
42	13	70	6	/	/	/	/	/	2089
43	15	10	8	/	/	/	/	/	1105
44	15	20	2	/	/	/	/	/	1664
45	15	30	3	/	/	/	/	/	1854
46	15	40	4	/	/	/	/	/	1787
47	15	50	5	/	/	/	/	/	1907
48	15	60	6	/	/	/	/	/	2004
49	15	70	7	/	/	/	/	/	2141

## Sheet: Fig. N9
Row Num.	1	2	3	4	5	6	7	8	Results
Experiment Num.	Frequency (Hz)	Amplitude (mm)	Amplitude coefficient	/	/	/	/	/	1-3: Q (nC)
1	0.6	8	1	/	/	/	/	/	17
2	0.6	12	2	/	/	/	/	/	31
3	0.6	16	3	/	/	/	/	/	589
4	0.6	20	4	/	/	/	/	/	1242
5	0.6	24	5	/	/	/	/	/	1107
6	0.6	28	6	/	/	/	/	/	1945
7	0.6	32	7	/	/	/	/	/	2075
8	0.8	8	2	/	/	/	/	/	144
9	0.8	12	3	/	/	/	/	/	325
10	0.8	16	4	/	/	/	/	/	2073
11	0.8	20	5	/	/	/	/	/	1827
12	0.8	24	6	/	/	/	/	/	1652
13	0.8	28	7	/	/	/	/	/	2140
14	0.8	32	1	/	/	/	/	/	380
15	1	8	3	/	/	/	/	/	940
16	1	12	4	/	/	/	/	/	2092
17	1	16	5	/	/	/	/	/	2061
18	1	20	6	/	/	/	/	/	2110
19	1	24	7	/	/	/	/	/	2187
20	1	28	1	/	/	/	/	/	1314
21	1	32	2	/	/	/	/	/	1874
22	1.2	8	4	/	/	/	/	/	1957
23	1.2	12	5	/	/	/	/	/	1990
24	1.2	16	6	/	/	/	/	/	2067
25	1.2	20	7	/	/	/	/	/	2427
26	1.2	24	1	/	/	/	/	/	1942
27	1.2	28	2	/	/	/	/	/	2347
28	1.2	32	3	/	/	/	/	/	2267
29	1.4	8	5	/	/	/	/	/	2330
30	1.4	12	6	/	/	/	/	/	2422
31	1.4	16	7	/	/	/	/	/	2432
32	1.4	20	1	/	/	/	/	/	2359
33	1.4	24	2	/	/	/	/	/	2331
34	1.4	28	3	/	/	/	/	/	2403
35	1.4	32	4	/	/	/	/	/	2425
36	1.6	8	6	/	/	/	/	/	2326
37	1.6	12	7	/	/	/	/	/	2445
38	1.6	16	1	/	/	/	/	/	113
39	1.6	20	2	/	/	/	/	/	2361
40	1.6	24	3	/	/	/	/	/	2283
41	1.6	28	4	/	/	/	/	/	2416
42	1.6	32	5	/	/	/	/	/	2469
43	1.8	8	7	/	/	/	/	/	2372
44	1.8	12	1	/	/	/	/	/	111
45	1.8	16	2	/	/	/	/	/	2412
46	1.8	20	3	/	/	/	/	/	2432
47	1.8	24	4	/	/	/	/	/	2379
48	1.8	28	5	/	/	/	/	/	2266
49	1.8	32	6	/	/	/	/	/	2193

## Sheet: Fig. N11
Row Num.	1	2	3	4	5	6	7	8	Results
Experiment Num	Frequency (Hz)	Pendulum angle (°)	Amplitude coefficient	/	/	/	/	/	1-3: Q (nC)
1	0.6	2	1	/	/	/	/	/	362
2	0.6	4	1.5	/	/	/	/	/	1386
3	0.6	6	2	/	/	/	/	/	1793
4	0.6	8	2.5	/	/	/	/	/	1892
5	0.6	10	3	/	/	/	/	/	2043
6	0.6	12	3.5	/	/	/	/	/	2216
7	0.6	14	4	/	/	/	/	/	2160
8	0.8	6	1.5	/	/	/	/	/	1922
9	0.8	8	2	/	/	/	/	/	1945
10	0.8	10	2.5	/	/	/	/	/	1927
11	0.8	12	3	/	/	/	/	/	1910
12	0.8	14	3.5	/	/	/	/	/	1966
13	0.8	2	4	/	/	/	/	/	2003
14	0.8	4	1	/	/	/	/	/	1786
15	1	10	2	/	/	/	/	/	1862
16	1	12	2.5	/	/	/	/	/	1689
17	1	14	3	/	/	/	/	/	1928
18	1	2	3.5	/	/	/	/	/	1890
19	1	4	4	/	/	/	/	/	2020
20	1	6	1	/	/	/	/	/	1725
21	1	8	1.5	/	/	/	/	/	1998
22	1.2	14	2.5	/	/	/	/	/	1961
23	1.2	2	3	/	/	/	/	/	2016
24	1.2	4	3.5	/	/	/	/	/	2084
25	1.2	6	4	/	/	/	/	/	1925
26	1.2	8	1	/	/	/	/	/	2038
27	1.2	10	1.5	/	/	/	/	/	2097
28	1.2	12	2	/	/	/	/	/	2014
29	1.4	4	3	/	/	/	/	/	2050
30	1.4	6	3.5	/	/	/	/	/	2064
31	1.4	8	4	/	/	/	/	/	1947
32	1.4	10	1	/	/	/	/	/	2248
33	1.4	12	1.5	/	/	/	/	/	2004
34	1.4	14	2	/	/	/	/	/	1948
35	1.4	2	2.5	/	/	/	/	/	2060
36	1.6	8	3.5	/	/	/	/	/	1974
37	1.6	10	4	/	/	/	/	/	1979
38	1.6	12	1	/	/	/	/	/	1976
39	1.6	14	1.5	/	/	/	/	/	1989
40	1.6	2	2	/	/	/	/	/	1978
41	1.6	4	2.5	/	/	/	/	/	2004
42	1.6	6	3	/	/	/	/	/	1997
43	1.8	12	4	/	/	/	/	/	1994
44	1.8	14	1	/	/	/	/	/	1939
45	1.8	2	1.5	/	/	/	/	/	1540
46	1.8	4	2	/	/	/	/	/	1951
47	1.8	6	2.5	/	/	/	/	/	1942
48	1.8	8	3	/	/	/	/	/	1945
49	1.8	10	3.5	/	/	/	/	/	2007
